# Supplementary material
Source: PubMed Central journal article supplement (PMC6643817)
Supplement: ao7b00291_si_001.pdf [file ao7b00291_si_001.pdf]

## Supporting Information

# Chemical modification of the siRNA seed region suppresses off-target effects by steric hindrance to base-pairing with targets

Hanna Iribe,<sup>†</sup> Kengo Miyamoto,<sup>‡</sup> Tomoko Takahashi,<sup>§</sup> Yoshiaki Kobayashi,<sup>§</sup>  
Jastina Leo,<sup>§<sup>l</sup></sup> Misako Aida,<sup>‡</sup> and Kumiko Ui-Tei<sup>†§\*</sup>

<sup>†</sup>Department of Computational Biology and Medical Science, Graduate School of Frontier Sciences, The University of Tokyo, Chiba, Japan.

<sup>‡</sup>Center for Quantum Life Sciences, and Department of Chemistry, Graduate School of Science, Hiroshima University, Higashi-Hiroshima, Japan.

<sup>§</sup>Department of Biological Sciences, Graduate School of Science, The University of Tokyo, Japan.

<sup>l</sup>Faculty of Microbiology, Immunology and Molecular Genetics, University of California, Los Angeles, USA.

\* To whom correspondence should be addressed. Tel: +81 3 5841 3043; Fax: +81 3 5841 3044; Email: ktei@bs.s.u-tokyo.ac.jp

### TABLE OF CONTENTS

|                                                                                                                       |     |
|-----------------------------------------------------------------------------------------------------------------------|-----|
| <b>1. Results of luciferase reporter assays of passenger strand</b> -----                                             | S2  |
| <b>2. Additional information on microarray analyses</b> -----                                                         | S3  |
| 2.1 MA plots and cumulative distributions of the seed-matched off-target transcripts of siRNA guide strand. -----     | S3  |
| 2.2 MA plots and cumulative distributions of the seed-matched off-target transcripts of siRNA passenger strand. ----- | S4  |
| <b>3. Supplementary computational data</b> -----                                                                      | S5  |
| 3.1 Total energy and ZPE-corrected energy of 5'-GC-3' RNA -----                                                       | S5  |
| 3.2 Modeling of 5'-AAA-3' RNA with AGO protein binding pocket-----                                                    | S20 |
| 3.3 Total energy of the model of 5'-AAA-3' RNA with AGO protein binding pocket -----                                  | S21 |

## 1. Results of luciferase reporter assays of passenger strand

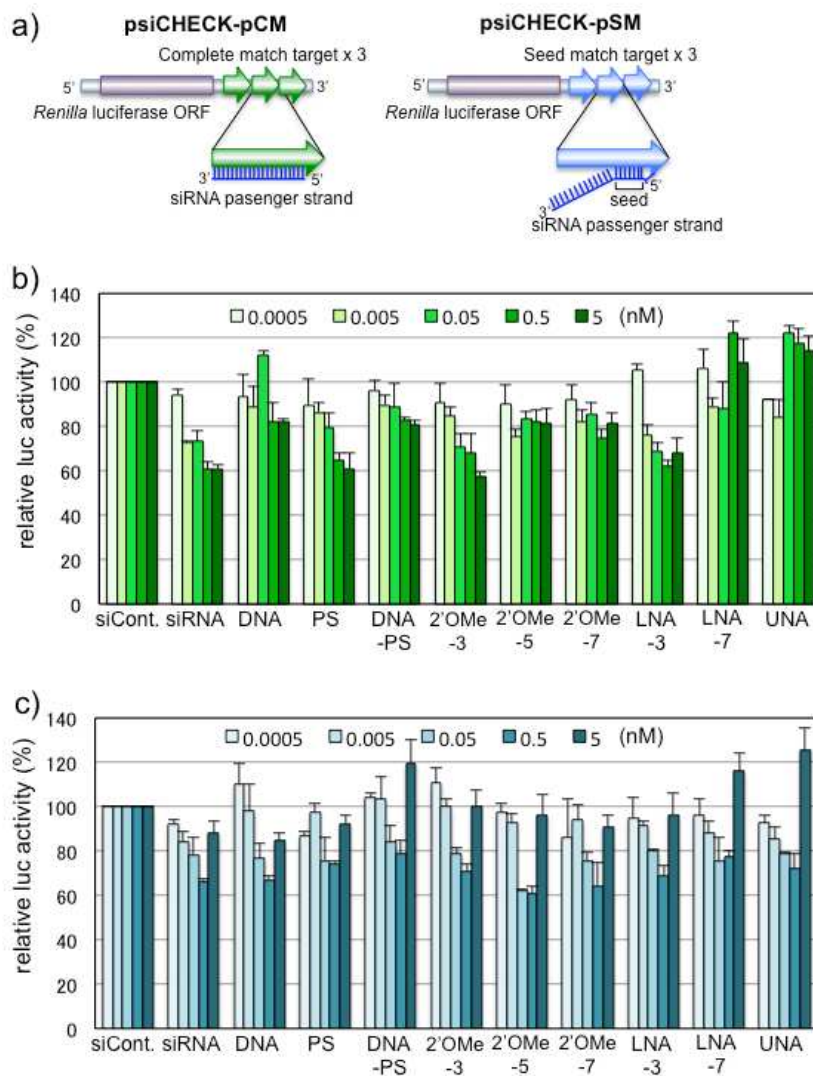

**Figure S1.** (a) Structures of reporter constructs for luciferase reporter assays. psiCHECK-pCM contains three tandem repeats of CM sequences of the siRNA passenger strand. psiCHECK-pSM contains three tandem repeats of SM sequences of the passenger strand. (b) Results of off-target effects on CM target using psiCHECK-pCM with unmodified or modified siRNA. (c) Results of seed-dependent off-target effects on SM target using psiCHECK-pSM with unmodified or modified siRNA. Each data shows an averaged value of three wells either of one or two independent experiments.

## 2. Additional information on microarray analyses

### 2.1 MA plots and cumulative distributions of the seed-matched off-target transcripts of siRNA guide strand.

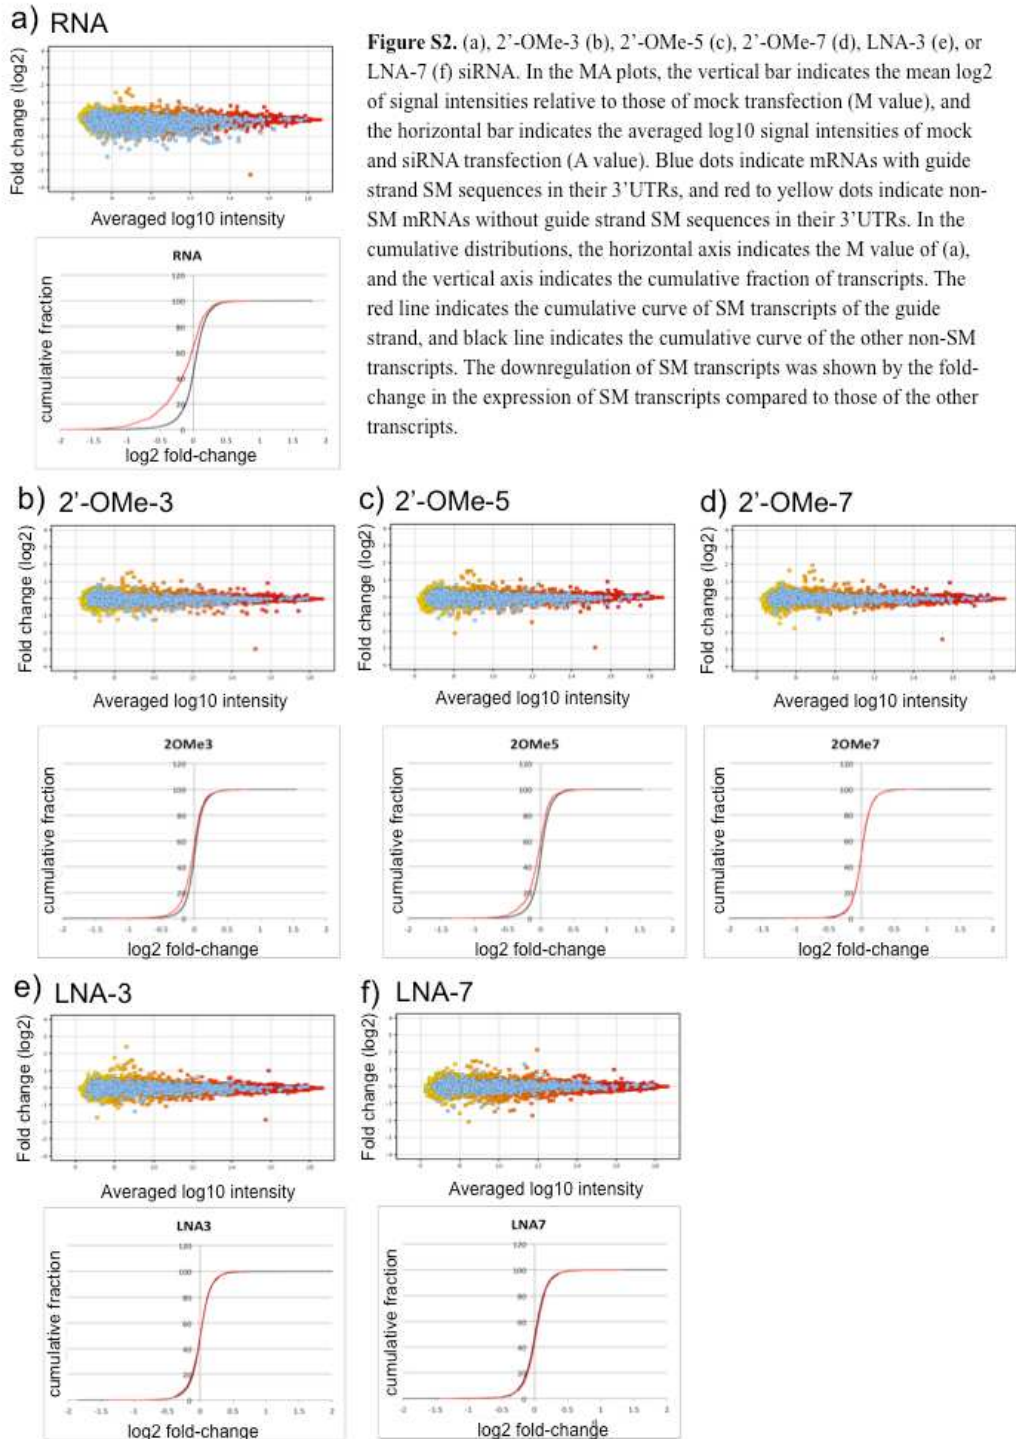

## 2.2 MA plots and cumulative distributions of the seed-matched off-target transcripts of siRNA passenger strand.

a) RNA

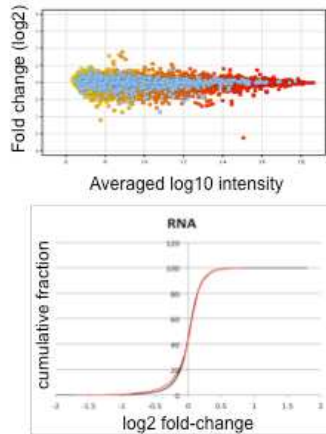

**Figure S3.** (a), 2'-OMe-3 (b), 2'-OMe-5 (c), 2'-OMe-7 (d), LNA-3 (e), or LNA-7 (f) siRNA. In the MA plots, the vertical bar indicates the mean log<sub>2</sub> of signal intensities relative to those of mock transfection (M value), and the horizontal bar indicates the averaged log<sub>10</sub> signal intensities of mock and siRNA transfection (A value). Blue dots indicate mRNAs with passenger strand SM sequences in their 3'UTRs, and red to yellow dots indicate non-SM mRNAs without passenger strand SM sequences in their 3'UTRs. In the cumulative distributions, the horizontal axis indicates the M value of (a), and the vertical axis indicates the cumulative fraction of transcripts. The red line indicates the cumulative curve of SM transcripts of the passenger strand, and black line indicates the cumulative curve of the other non-SM transcripts. The downregulation of SM transcripts was shown by the fold-change in the expression of SM transcripts compared to those of the other transcripts.

b) 2'-OMe-3

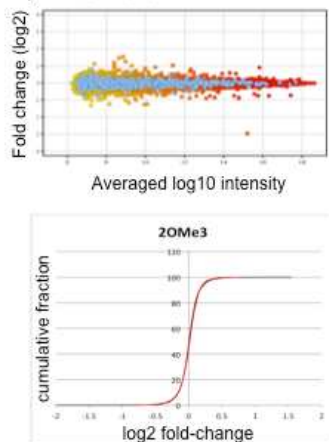

c) 2'-OMe-5

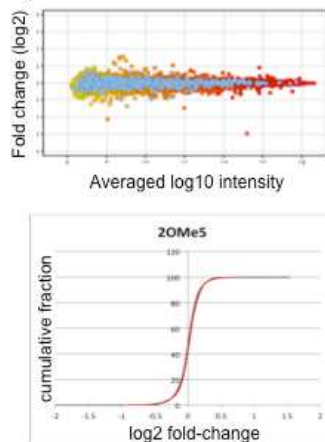

d) 2'-OMe-7

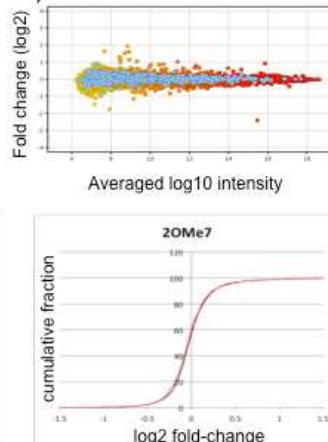

e) LNA-3

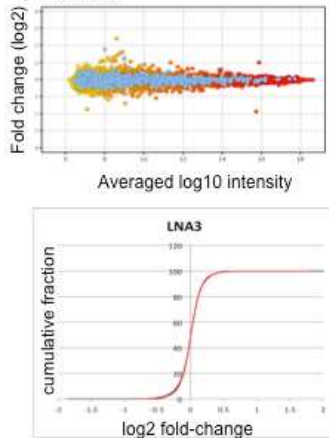

f) LNA-7

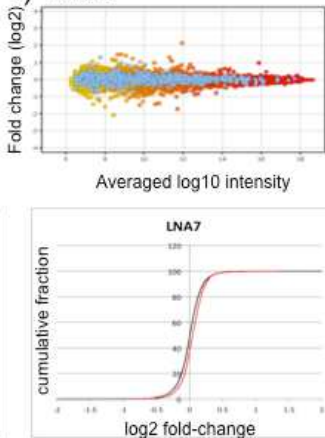

### 3. Supplementary computational data

#### 3.1 Total energy and ZPE-corrected energy of 5'-GC-3' RNA

Table S1. Total energy and ZPE-corrected energy of 5'-GC-3' RNA

|                           | Total energy<br>(a.u) | Zero-point<br>energy (a.u) | ZPE-corrected<br>energy<br>(a.u) | Relative energy<br>(kJ mol <sup>-1</sup> ) |
|---------------------------|-----------------------|----------------------------|----------------------------------|--------------------------------------------|
| unmodified RNA            |                       |                            |                                  |                                            |
| Structure 1 (Fig 4a) (*1) | -3632.733071          | 0.583801                   | -3632.149271                     | 0                                          |
| Structure 2 (Fig 4b) (*2) | -3632.718196          | 0.582579                   | -3632.135617                     | 35.8                                       |
| Structure 3 (Fig 4c) (*3) | -3632.712074          | 0.582627                   | -3632.129447                     | 52                                         |
| LNA                       |                       |                            |                                  |                                            |
| Structure 1 (Fig 4d) (*4) | -3708.879704          | 0.595932                   | -3708.283772                     | 0                                          |
| Structure 3 (Fig 4f) (*5) | -3708.855978          | 0.594473                   | -3708.261505                     | 58.4                                       |
| 2'-OMe                    |                       |                            |                                  |                                            |
| Structure 1 (Fig 4g) (*6) | -3711.301628          | 0.640023                   | -3710.661605                     | 0                                          |
| Structure 2 (Fig 4h) (*7) | -3711.269529          | 0.636785                   | -3710.632744                     | 75.7                                       |
| Structure 4 (Fig 4i) (*8) | -3711.265146          | 0.637625                   | -3710.627521                     | 89.4                                       |

(\*1) Figure 4a

Unmodified 5'-GC-3' RNA (Structure 1), W-C face

Number of atoms = 78

Total charge = -3

|   |              |              |              |
|---|--------------|--------------|--------------|
| C | -2.443964398 | 0.232242153  | -1.774223145 |
| C | -3.373884669 | -1.736805695 | -0.939829159 |
| O | -3.619819344 | -0.506362217 | -1.641346728 |
| H | -2.317712894 | 0.562354337  | -2.809516552 |
| C | -4.544768236 | -2.049052985 | -0.026240322 |
| H | -4.298197934 | -2.955698536 | 0.542755917  |
| C | -1.291300156 | -0.674386652 | -1.354802021 |
| C | -1.975163297 | -1.587528259 | -0.320158368 |
| H | -0.430568885 | -0.1191609   | -0.97225461  |
| O | -1.339139037 | -2.844454615 | -0.285727308 |
| H | -2.013845644 | -1.133763506 | 0.674962123  |
| H | -5.418195628 | -2.270314151 | -0.653317192 |
| O | -4.822702099 | -0.972740486 | 0.83245293   |
| P | -6.403029485 | -0.823973972 | 1.371567567  |
| O | -7.15201889  | -0.545147498 | -0.094275812 |
| C | -6.789673034 | 0.636364652  | -0.770953257 |
| H | -6.722031603 | 1.482894882  | -0.07638427  |
| H | -5.825972385 | 0.52021765   | -1.283827375 |
| H | -7.565695094 | 0.847223321  | -1.520033819 |
| O | -6.910966061 | -2.150996716 | 1.822558529  |
| O | -6.410470729 | 0.43078353   | 2.178415168  |
| P | -0.130071945 | -3.123496227 | 0.860205629  |
| O | -0.535219797 | -2.460176416 | 2.129775662  |
| O | 0.255343816  | -4.545196429 | 0.660269493  |
| O | 1.0691836    | -2.13367626  | 0.262732664  |
| C | 1.890420706  | -2.47626828  | -0.823191387 |
| C | 2.908414112  | -1.366452422 | -1.03391229  |
| H | 1.296315447  | -2.581579384 | -1.740455306 |

|   |              |              |              |
|---|--------------|--------------|--------------|
| H | 2.419408396  | -3.418665063 | -0.636139392 |
| C | 3.914665428  | -1.134534655 | 0.100327676  |
| O | 2.223763371  | -0.120664765 | -1.211549213 |
| C | 4.231288918  | 0.368457421  | -0.061545787 |
| C | 2.897077905  | 0.926618789  | -0.568450709 |
| H | 3.097467151  | 1.742280846  | -1.262346879 |
| O | 5.16449147   | 0.602149304  | -1.091237996 |
| O | 4.990611566  | -2.02424797  | -0.085038686 |
| H | 4.544423069  | 0.825933173  | 0.881756662  |
| H | 3.443243985  | -1.303188369 | 1.075822831  |
| N | -2.514863672 | 1.448495864  | -0.950620283 |
| C | -3.323825833 | 1.744412137  | 0.130749517  |
| N | -3.067410707 | 2.922792357  | 0.645971942  |
| C | -2.033680013 | 3.42072808   | -0.119694099 |
| C | -1.670303409 | 2.50730987   | -1.098031499 |
| N | -0.626305351 | 2.559002046  | -1.96642092  |
| C | 0.128570521  | 3.604862553  | -1.775277366 |
| N | 1.313663302  | 3.757842934  | -2.476660653 |
| N | -0.184736679 | 4.616125547  | -0.90558031  |
| C | -1.249287955 | 4.609581263  | 0.029376178  |
| O | -1.360650765 | 5.538510368  | 0.822182584  |
| H | 0.537165514  | 5.292040929  | -0.688486194 |
| H | 2.0820406    | 3.940721028  | -1.821974459 |
| H | 1.501034777  | 2.890407477  | -2.969132445 |
| H | -4.064610679 | 1.037926016  | 0.490306058  |
| N | 2.028104266  | 1.504980573  | 0.479760506  |
| C | 2.032202491  | 2.899947662  | 0.665134397  |
| O | 2.818438278  | 3.599085014  | 0.004785876  |
| N | 1.132093373  | 3.437062753  | 1.526596187  |
| C | 0.235683421  | 2.665920853  | 2.126734282  |
| N | -0.716451668 | 3.291244076  | 2.882657448  |
| H | -0.849287478 | 4.261592349  | 2.611512965  |
| H | -1.597953217 | 2.794745982  | 2.936785534  |
| C | 0.236686326  | 1.248420795  | 2.005097163  |
| C | 1.149759369  | 0.715642905  | 1.1560831    |
| H | -0.469145696 | 0.60182558   | 2.512174619  |
| H | 1.183516109  | -0.350554429 | 0.953256693  |
| P | 6.386056196  | -1.915621561 | 0.813658955  |
| O | 6.1704097    | -1.013905291 | 1.977882122  |
| O | 6.989606198  | -3.276584009 | 0.847541397  |
| O | 7.284594646  | -0.993015715 | -0.292206607 |
| C | 7.614051727  | -1.638421341 | -1.501693919 |
| H | 8.342932333  | -1.010426462 | -2.029382848 |
| H | 6.724535945  | -1.760992326 | -2.135115916 |
| H | 8.046026731  | -2.625634029 | -1.304677665 |
| O | -0.929226074 | -1.45662249  | -2.4753503   |
| H | -3.307856616 | -2.549776055 | -1.677243666 |
| H | -0.801754315 | -2.345165048 | -2.097581222 |
| H | 6.00044667   | 0.18431123   | -0.803573879 |

|   |             |              |             |
|---|-------------|--------------|-------------|
| H | 3.486190935 | -1.587398115 | -1.94176854 |
|---|-------------|--------------|-------------|

(\*2) Figure 4b

Unmodified 5'-GC-3' RNA (Structure 2), rigid strand 1

Number of atoms = 78

Total charge = -3

|   |              |              |              |
|---|--------------|--------------|--------------|
| C | -2.403497345 | 0.196308102  | -0.993885143 |
| C | -2.463307104 | -2.131182005 | -0.903653225 |
| O | -3.043311378 | -0.946229572 | -1.469466715 |
| H | -2.035226381 | 0.808841573  | -1.822145152 |
| C | -3.563601642 | -3.140008586 | -0.636356483 |
| H | -3.115091462 | -4.022695288 | -0.161296972 |
| H | -1.758830256 | -2.559517731 | -1.629616981 |
| C | -1.206491647 | -0.248327913 | -0.151934973 |
| C | -1.636059777 | -1.658828993 | 0.29729266   |
| O | -0.132906546 | -0.275805873 | -1.053955307 |
| H | 0.641870225  | -0.653559482 | -0.603124714 |
| H | -1.015272634 | 0.416741548  | 0.697086599  |
| O | -0.584343651 | -2.574111439 | 0.495784294  |
| H | -2.263931512 | -1.582578258 | 1.192735655  |
| H | -3.998029221 | -3.452423101 | -1.595053107 |
| O | -4.554510311 | -2.570577483 | 0.184658979  |
| P | -6.08471955  | -3.24496004  | 0.117638095  |
| O | -6.430552086 | -2.950796324 | -1.488806474 |
| C | -6.496711739 | -1.598897856 | -1.87991055  |
| H | -7.058030688 | -1.002622569 | -1.149621234 |
| H | -5.493388656 | -1.166409284 | -1.991875137 |
| H | -7.009842909 | -1.553698417 | -2.850373537 |
| O | -5.993675257 | -4.728556498 | 0.234600166  |
| O | -6.92442233  | -2.358601833 | 0.976125667  |
| P | 0.570675925  | -2.316790454 | 1.664802052  |
| O | 0.139948908  | -1.188279884 | 2.543000564  |
| O | 1.057039859  | -3.650458305 | 2.103494779  |
| O | 1.753420185  | -1.614639488 | 0.692770781  |
| C | 2.545334467  | -2.3537323   | -0.204920001 |
| C | 3.48661413   | -1.379346935 | -0.906940339 |
| H | 1.904148241  | -2.849597945 | -0.946808932 |
| H | 3.129474618  | -3.117620832 | 0.321761552  |
| H | 4.001128012  | -1.902414124 | -1.724230372 |
| C | 4.565955056  | -0.722709787 | -0.034144223 |
| O | 2.708479656  | -0.311378694 | -1.452096825 |
| C | 4.715565975  | 0.672259373  | -0.688913221 |
| C | 3.309830174  | 0.942860429  | -1.242985275 |
| H | 3.379200778  | 1.489601431  | -2.181748043 |
| O | 5.575053595  | 0.641247383  | -1.804044044 |
| O | 5.710930996  | -1.542965817 | -0.05953213  |
| H | 5.029656435  | 1.425424709  | 0.04122475   |
| H | 4.219332254  | -0.603735302 | 0.998698111  |
| H | 6.457726079  | 0.393301401  | -1.464846407 |

|   |              |              |              |
|---|--------------|--------------|--------------|
| N | -3.37465075  | 1.038928127  | -0.277217265 |
| C | -4.600366863 | 0.711594708  | 0.267730037  |
| N | -5.270741053 | 1.763194625  | 0.677793771  |
| C | -4.450607644 | 2.831043836  | 0.391987824  |
| C | -3.265860463 | 2.391395427  | -0.187605864 |
| N | -2.190993559 | 3.119709834  | -0.603788306 |
| C | -2.335564978 | 4.391128331  | -0.396994439 |
| N | -1.290939376 | 5.285043794  | -0.603848584 |
| N | -3.478912625 | 4.941850731  | 0.133000774  |
| C | -4.636131549 | 4.241598754  | 0.584390587  |
| O | -5.563228268 | 4.884740801  | 1.05492237   |
| H | -3.479295468 | 5.926529233  | 0.360179906  |
| H | -1.497521818 | 6.045233812  | -1.239599023 |
| H | -0.406261864 | 4.807041565  | -0.819619612 |
| H | -4.926944458 | -0.321409957 | 0.335948394  |
| N | 2.461595885  | 1.783037895  | -0.372981915 |
| C | 2.058857665  | 3.063361119  | -0.831382955 |
| O | 2.467411825  | 3.494940224  | -1.901887557 |
| N | 1.213584634  | 3.784422232  | -0.021484735 |
| C | 0.784533597  | 3.27845462   | 1.121818113  |
| N | -0.015076853 | 4.07585189   | 1.904425062  |
| H | -0.437826184 | 4.852604292  | 1.409257968  |
| H | -0.642322628 | 3.580595848  | 2.521936293  |
| C | 1.135111575  | 1.984372371  | 1.58100563   |
| C | 1.967949068  | 1.274361048  | 0.782020482  |
| H | 0.723629164  | 1.522564033  | 2.470040166  |
| H | 2.222109141  | 0.250375439  | 1.023403936  |
| P | 7.130878682  | -1.067988583 | 0.667549397  |
| O | 6.881070242  | 0.120002646  | 1.529341728  |
| O | 7.859037678  | -2.306717674 | 1.058586802  |
| O | 7.885902122  | -0.452696368 | -0.720699609 |
| C | 8.219484935  | -1.406335954 | -1.70527046  |
| H | 8.813854417  | -0.898249695 | -2.474731881 |
| H | 7.314450493  | -1.820972336 | -2.169525903 |
| H | 8.798798794  | -2.226047203 | -1.266503319 |

(\*3) Figure 4c

Unmodified 5'-GC-3' RNA (Structure 3), rigid strand 2

Number of atoms = 78

Total charge = -3

|   |              |              |              |
|---|--------------|--------------|--------------|
| C | -2.632249834 | 0.420678559  | -0.871013601 |
| C | -2.61551079  | -1.894425387 | -0.604707828 |
| O | -3.248668708 | -0.76838536  | -1.251984535 |
| H | -2.39514606  | 1.026194567  | -1.752310078 |
| C | -3.662624674 | -2.940169239 | -0.277823753 |
| H | -3.166522233 | -3.761482379 | 0.256235956  |
| C | -1.363199467 | 0.041672131  | -0.117409392 |
| C | -1.795255313 | -1.281324128 | 0.536922749  |
| O | -0.381788714 | -0.184287658 | -1.100743744 |



|   |              |              |              |
|---|--------------|--------------|--------------|
| H | -1.056277151 | 0.788171618  | 0.621299904  |
| O | -0.729322208 | -2.132969724 | 0.870623312  |
| H | -2.427683571 | -1.078592658 | 1.409542757  |
| H | -4.057220889 | -3.339210894 | -1.221233474 |
| O | -4.706651477 | -2.395265848 | 0.492242572  |
| P | -6.198817945 | -3.151730443 | 0.378858773  |
| O | -6.509864334 | -2.867020335 | -1.236393241 |
| C | -6.639388041 | -1.519713434 | -1.625675892 |
| H | -7.239253412 | -0.955407553 | -0.900500387 |
| H | -5.657206954 | -1.038972989 | -1.725208934 |
| H | -7.142738662 | -1.498636735 | -2.602197329 |
| O | -6.026358539 | -4.628147936 | 0.490365908  |
| O | -7.11337226  | -2.319945103 | 1.213700015  |
| P | 0.432856649  | -1.601824629 | 1.955054287  |
| O | -0.021090179 | -0.310868428 | 2.545033163  |
| O | 0.914508474  | -2.797160672 | 2.695879925  |
| O | 1.620288638  | -1.171662582 | 0.826111814  |
| C | 2.514053161  | -2.187022341 | 0.40981274   |
| C | 3.639984118  | -1.599222086 | -0.418756169 |
| H | 1.975006168  | -2.930226711 | -0.194264544 |
| H | 2.940412173  | -2.698067866 | 1.278985651  |
| C | 4.575515282  | -0.598103915 | 0.272222242  |
| O | 3.083883393  | -0.909597353 | -1.54044735  |
| C | 5.043016582  | 0.273073755  | -0.917926149 |
| C | 3.832778929  | 0.236388067  | -1.858986201 |
| H | 4.183567308  | 0.204791732  | -2.890293697 |
| O | 6.099795744  | -0.327985451 | -1.628869261 |
| O | 5.583214556  | -1.317663584 | 0.942125593  |
| H | 5.295700981  | 1.289496828  | -0.599867221 |
| H | 4.024452904  | 0.022816668  | 0.988005317  |
| N | -3.560727404 | 1.217481574  | -0.04254798  |
| C | -4.706527977 | 0.79563196   | 0.610048906  |
| N | -5.31412306  | 1.765006923  | 1.247660337  |
| C | -4.532462864 | 2.872640946  | 1.020396294  |
| C | -3.437988605 | 2.545358855  | 0.227298199  |
| N | -2.436739691 | 3.366559322  | -0.212119126 |
| C | -2.530884506 | 4.583824275  | 0.248089983  |
| N | -1.548493964 | 5.515568792  | -0.009274938 |
| N | -3.566974913 | 5.005188797  | 1.037310527  |
| C | -4.668199088 | 4.218055497  | 1.495693279  |
| O | -5.513724249 | 4.757089155  | 2.191490162  |
| H | -3.529934128 | 5.926352563  | 1.451551752  |
| H | -1.873650236 | 6.460273492  | -0.157625804 |
| H | -0.872002289 | 5.204613641  | -0.709340807 |
| H | -5.012509252 | -0.245547555 | 0.585572514  |
| N | 2.941473213  | 1.407646178  | -1.790739794 |
| C | 2.856090101  | 2.25715596   | -2.925964066 |
| O | 3.71623729   | 2.202958049  | -3.794374823 |
| N | 1.75503148   | 3.073190492  | -3.007714147 |

|   |              |              |              |
|---|--------------|--------------|--------------|
| C | 0.925323127  | 3.144565331  | -1.994081245 |
| N | -0.234338034 | 3.89490896   | -2.176517965 |
| H | -0.378314142 | 4.078074001  | -3.163345327 |
| H | -1.046603688 | 3.456260523  | -1.734056292 |
| C | 1.12188172   | 2.49427866   | -0.75118395  |
| C | 2.106386136  | 1.559667165  | -0.734507002 |
| H | 0.420109641  | 2.585880516  | 0.067164565  |
| H | 2.214782185  | 0.861484387  | 0.089606879  |
| P | 6.879709418  | -0.539212164 | 1.639081434  |
| O | 6.624202021  | 0.927327731  | 1.674229186  |
| O | 7.347829132  | -1.383542729 | 2.771806873  |
| O | 7.972205124  | -0.758400246 | 0.359174231  |
| C | 8.34875902   | -2.093135392 | 0.102044476  |
| H | 9.141997203  | -2.077176624 | -0.655729311 |
| H | 7.49784803   | -2.670574647 | -0.284236617 |
| H | 8.71548951   | -2.572964086 | 1.016108457  |
| H | -1.897695598 | -2.337536324 | -1.306732596 |
| H | 0.380491795  | -0.59740714  | -0.652890015 |
| H | 4.267657091  | -2.427408454 | -0.778260686 |
| H | 6.856957806  | -0.37930589  | -1.011901456 |

(\*4) Figure 4d

LNA-modified 5'-GC-3' RNA (Structure 1), W-C face

Number of atoms = 80

Total charge = -3

|   |              |              |              |
|---|--------------|--------------|--------------|
| C | -2.343059526 | 0.339273626  | -1.412036399 |
| C | -3.283190752 | -1.651653001 | -0.759120382 |
| O | -3.573215791 | -0.297451044 | -1.178896223 |
| H | -2.271363572 | 0.699688394  | -2.443407456 |
| C | -4.514154685 | -2.258713598 | -0.129557003 |
| H | -4.233318793 | -3.233188611 | 0.290268408  |
| C | -1.318656602 | -0.764509008 | -1.150658786 |
| C | -1.966674017 | -1.49585271  | 0.031094456  |
| H | -0.278349499 | -0.458039774 | -1.085483609 |
| O | -1.391490848 | -2.740505603 | 0.284568906  |
| H | -2.070305551 | -0.898063671 | 0.940953908  |
| H | -5.261805595 | -2.430886213 | -0.915038733 |
| O | -5.025228501 | -1.409432416 | 0.867086828  |
| P | -6.686333376 | -1.442292279 | 1.083613282  |
| O | -7.147518846 | -0.697893926 | -0.337163709 |
| C | -6.769311233 | 0.650418716  | -0.48760251  |
| H | -6.989014744 | 1.224637701  | 0.421199969  |
| H | -5.699703286 | 0.738663375  | -0.7137994   |
| H | -7.34267258  | 1.068763717  | -1.326628217 |
| O | -7.175281332 | -2.847195195 | 0.963064566  |
| O | -6.962038334 | -0.529792249 | 2.231077785  |
| P | -0.164766593 | -2.86857977  | 1.418124813  |
| O | -0.440842871 | -1.906382432 | 2.524167393  |
| O | 0.099328939  | -4.325822139 | 1.537129304  |

|   |              |              |              |
|---|--------------|--------------|--------------|
| O | 1.087253709  | -2.133562614 | 0.599105982  |
| C | 1.685031181  | -2.615770699 | -0.576132564 |
| C | 2.616076683  | -1.50831874  | -1.028396014 |
| H | 0.924906928  | -2.811431021 | -1.346262996 |
| H | 2.258387097  | -3.531346718 | -0.388067102 |
| C | 3.774990243  | -1.08766921  | -0.093670862 |
| O | 1.824136121  | -0.30512415  | -1.163013535 |
| C | 4.04476815   | 0.152374623  | -0.945580845 |
| C | 2.656385765  | 0.804314762  | -0.953446676 |
| H | 2.55986841   | 1.519515452  | -1.77085523  |
| O | 4.196238831  | -0.381164383 | -2.275018883 |
| O | 4.778470688  | -2.056100908 | -0.110589036 |
| H | 4.893473999  | 0.782455293  | -0.697352902 |
| H | 3.456872615  | -0.856095209 | 0.924667523  |
| N | -2.239350241 | 1.517066212  | -0.550503146 |
| C | -2.92586904  | 1.80171668   | 0.610700404  |
| N | -2.617151314 | 2.972254501  | 1.113690317  |
| C | -1.679139611 | 3.483253151  | 0.240572063  |
| C | -1.4275204   | 2.583710503  | -0.78708032  |
| N | -0.517630027 | 2.669554147  | -1.79343722  |
| C | 0.195924729  | 3.75852665   | -1.726561916 |
| N | 1.246252038  | 3.985752205  | -2.605768937 |
| N | -0.029445753 | 4.753346359  | -0.814913286 |
| C | -0.936310596 | 4.708506175  | 0.269624458  |
| O | -0.976093407 | 5.647261763  | 1.058223493  |
| H | 0.649857042  | 5.50005549   | -0.750667372 |
| H | 2.111946419  | 4.090429097  | -2.062304146 |
| H | 1.342804139  | 3.162970267  | -3.192374315 |
| H | -3.647284268 | 1.098889583  | 1.010156391  |
| N | 2.202324777  | 1.501322757  | 0.270756245  |
| C | 2.406515244  | 2.887533335  | 0.36285866   |
| O | 3.12184514   | 3.442701303  | -0.486905812 |
| N | 1.757316779  | 3.572311729  | 1.340875043  |
| C | 0.942060168  | 2.932928321  | 2.168246443  |
| N | 0.222700416  | 3.694291666  | 3.051438543  |
| H | 0.093374607  | 4.646994658  | 2.724976645  |
| H | -0.655142845 | 3.273118136  | 3.329024029  |
| C | 0.775672306  | 1.522380324  | 2.156566135  |
| C | 1.403902933  | 0.848897262  | 1.16396755   |
| H | 0.126919849  | 0.982357183  | 2.835119325  |
| H | 1.26132061   | -0.218968687 | 1.027451333  |
| P | 6.244241894  | -1.708251004 | 0.638670309  |
| O | 5.998524882  | -0.754684181 | 1.755197738  |
| O | 6.952127043  | -3.017207708 | 0.738470202  |
| O | 6.95522387   | -0.804748266 | -0.569089022 |
| C | 7.251152875  | -1.46894706  | -1.771203177 |
| H | 7.942755102  | -0.835565209 | -2.3433492   |
| H | 6.343916274  | -1.616881526 | -2.370228579 |
| H | 7.723740167  | -2.44058879  | -1.57960876  |

|   |              |              |              |
|---|--------------|--------------|--------------|
| O | -1.487373556 | -1.680359623 | -2.240649034 |
| C | -2.734857841 | -2.35261185  | -2.005169818 |
| H | -2.556306427 | -3.418918724 | -1.834285623 |
| H | -3.401444346 | -2.205569161 | -2.863069387 |
| C | 3.381974037  | -1.568269422 | -2.346096015 |
| H | 4.018371823  | -2.455449184 | -2.428285702 |
| H | 2.704971077  | -1.491551428 | -3.203417592 |

(\*5) Figure 4f

LNA-modified 5'-GC-3' RNA (Structure 3), rigid strand 2

Number of atoms = 80

Total charge = -3

|   |              |              |              |
|---|--------------|--------------|--------------|
| C | -2.473114195 | 0.542085995  | -0.641614468 |
| C | -2.310785859 | -1.685887401 | -1.209089108 |
| O | -3.10218264  | -0.476589862 | -1.373359583 |
| H | -2.194242383 | 1.381735234  | -1.288637521 |
| C | -3.147931054 | -2.875490017 | -1.609075056 |
| H | -2.568696184 | -3.786254759 | -1.411550294 |
| C | -1.223684933 | -0.150141299 | -0.098710137 |
| C | -1.766388964 | -1.541774252 | 0.224809151  |
| O | -0.4215262   | -0.346025043 | -1.260144715 |
| H | -0.670457908 | 0.353322473  | 0.686816598  |
| O | -0.795172106 | -2.504311326 | 0.497237492  |
| H | -2.558366493 | -1.528965353 | 0.97882649   |
| H | -3.344094206 | -2.821328321 | -2.688450504 |
| O | -4.351337639 | -2.872667392 | -0.881060087 |
| P | -5.668526626 | -3.610049491 | -1.605690521 |
| O | -5.906829645 | -2.53613281  | -2.860764111 |
| C | -6.257537875 | -1.220146564 | -2.502120179 |
| H | -7.030192502 | -1.216303965 | -1.7228059   |
| H | -5.384257185 | -0.663401623 | -2.139570325 |
| H | -6.64982251  | -0.720900811 | -3.398990496 |
| O | -5.235995109 | -4.881455378 | -2.255072384 |
| O | -6.784021606 | -3.479106226 | -0.623712625 |
| P | 0.21162887   | -2.281791106 | 1.832725212  |
| O | -0.367236326 | -1.179396985 | 2.6540276    |
| O | 0.569941435  | -3.647979172 | 2.302392226  |
| O | 1.548266044  | -1.619936297 | 1.078214242  |
| C | 2.450791942  | -2.501780172 | 0.448090385  |
| C | 3.3565838    | -1.699854626 | -0.454924983 |
| H | 1.912184752  | -3.244978806 | -0.155297364 |
| H | 3.057415109  | -3.035997258 | 1.188401459  |
| C | 4.292478592  | -0.61840209  | 0.133889173  |
| O | 2.531045722  | -0.977491815 | -1.388999675 |
| C | 4.656992367  | -0.140694239 | -1.275037159 |
| C | 3.266706435  | 0.117726678  | -1.867520583 |
| H | 3.299382563  | 0.132232341  | -2.958385054 |
| O | 5.106781197  | -1.341576472 | -1.926556701 |
| O | 5.33676207   | -1.204854039 | 0.848602642  |

|   |              |              |              |
|---|--------------|--------------|--------------|
| H | 5.401038474  | 0.642564157  | -1.385147166 |
| H | 3.781526251  | 0.136254428  | 0.733988514  |
| N | -3.411260522 | 1.066206287  | 0.354639166  |
| C | -4.564037619 | 0.474021206  | 0.830881814  |
| N | -5.197351603 | 1.217677959  | 1.702704152  |
| C | -4.422405579 | 2.350348907  | 1.81411786   |
| C | -3.312239622 | 2.268122834  | 0.981213115  |
| N | -2.322321768 | 3.189738779  | 0.789038968  |
| C | -2.434274485 | 4.229474515  | 1.5685738    |
| N | -1.462255545 | 5.203489293  | 1.580385199  |
| N | -3.479621442 | 4.402631625  | 2.436465774  |
| C | -4.578668551 | 3.510620788  | 2.64234803   |
| O | -5.439247686 | 3.828057267  | 3.446512524  |
| H | -3.458344306 | 5.172926131  | 3.090583828  |
| H | -1.783393278 | 6.151471091  | 1.712189484  |
| H | -0.77138868  | 5.10439199   | 0.835893497  |
| H | -4.867064789 | -0.5043308   | 0.476078525  |
| N | 2.568936498  | 1.359102211  | -1.464956665 |
| C | 2.639644792  | 2.470154164  | -2.340770225 |
| O | 3.481856289  | 2.478177235  | -3.229057847 |
| N | 1.694402847  | 3.456258565  | -2.177965659 |
| C | 0.879839606  | 3.397580402  | -1.150740531 |
| N | -0.141972874 | 4.35333487   | -1.080433721 |
| H | -0.221158366 | 4.835246351  | -1.969584063 |
| H | -1.019934962 | 3.909942568  | -0.804584345 |
| C | 0.934860582  | 2.4140892    | -0.138486307 |
| C | 1.742706009  | 1.350058522  | -0.393631319 |
| H | 0.256708802  | 2.421767645  | 0.70358985   |
| H | 1.716506907  | 0.441476154  | 0.200915961  |
| P | 6.543493954  | -0.203715694 | 1.456228541  |
| O | 5.955417251  | 1.130892781  | 1.759599595  |
| O | 7.318814477  | -1.055325913 | 2.404156712  |
| O | 7.441226131  | 0.010613028  | 0.067809015  |
| C | 8.065633306  | -1.130673988 | -0.467200913 |
| H | 8.836592619  | -0.791824737 | -1.172851024 |
| H | 7.342620506  | -1.750481772 | -1.011879571 |
| H | 8.536803388  | -1.727986545 | 0.323528886  |
| C | -1.019276296 | -1.426116098 | -1.989389978 |
| C | 4.368393482  | -2.42894907  | -1.339997708 |
| H | 3.863458097  | -2.993975766 | -2.131191763 |
| H | 5.044224442  | -3.075499828 | -0.770849831 |
| H | -1.230852937 | -1.101599199 | -3.014321114 |
| H | -0.344992555 | -2.287439293 | -1.990103194 |

(\*6) Figure 4g

2'-OMe-modified 5'-GC-3' RNA (Structure 1), W-C face

Number of atoms = 84

Total charge = -3

|   |              |             |              |
|---|--------------|-------------|--------------|
| C | -2.447255234 | 0.130770154 | -1.734932055 |
|---|--------------|-------------|--------------|

|   |              |              |              |
|---|--------------|--------------|--------------|
| C | -3.340115764 | -1.818402669 | -0.818698014 |
| O | -3.610223417 | -0.609715184 | -1.556617308 |
| H | -2.377352572 | 0.453599033  | -2.778452955 |
| C | -4.48716822  | -2.087878869 | 0.139665679  |
| H | -4.207972234 | -2.942056781 | 0.770756319  |
| C | -1.274663254 | -0.778572728 | -1.341830952 |
| C | -1.930971275 | -1.626825035 | -0.241300343 |
| H | -0.391387988 | -0.226872373 | -1.006753164 |
| O | -1.314391145 | -2.860416143 | -0.0294716   |
| H | -1.973627932 | -1.043775615 | 0.687437065  |
| H | -5.368358599 | -2.373151782 | -0.449043434 |
| O | -4.769445407 | -0.953198321 | 0.919284489  |
| P | -6.350871948 | -0.734421715 | 1.420732653  |
| O | -7.083729397 | -0.55618005  | -0.06954376  |
| C | -6.724828011 | 0.584032518  | -0.814623593 |
| H | -6.674800419 | 1.47263745   | -0.173045772 |
| H | -5.753696286 | 0.44580031   | -1.306816228 |
| H | -7.493856304 | 0.739093829  | -1.584658391 |
| O | -6.894425259 | -2.008733666 | 1.970472251  |
| O | -6.34063319  | 0.582811756  | 2.122946961  |
| P | -0.222643769 | -3.040149568 | 1.224639422  |
| O | -0.594410545 | -2.102081169 | 2.324868902  |
| O | 0.002543894  | -4.50498926  | 1.3374509    |
| O | 1.130209264  | -2.313887322 | 0.566511312  |
| C | 1.764065435  | -2.760825622 | -0.600233072 |
| C | 2.773580225  | -1.704719648 | -1.031277331 |
| H | 1.025204232  | -2.908444243 | -1.399285471 |
| H | 2.296462892  | -3.705661487 | -0.427190333 |
| C | 3.910317507  | -1.384623362 | -0.051567793 |
| O | 2.080847296  | -0.45575303  | -1.217035592 |
| C | 4.199652477  | 0.091805338  | -0.365487439 |
| C | 2.808997138  | 0.634929014  | -0.726601429 |
| H | 2.909483197  | 1.392911243  | -1.50382098  |
| O | 4.994792881  | 0.192327643  | -1.529248277 |
| O | 4.98071175   | -2.260965698 | -0.248684366 |
| H | 4.669340445  | 0.598438982  | 0.482749154  |
| H | 3.541596874  | -1.442074487 | 0.979675889  |
| N | -2.47451579  | 1.36717315   | -0.937617646 |
| C | -3.25028589  | 1.723254974  | 0.150320929  |
| N | -2.948711854 | 2.912269515  | 0.615354005  |
| C | -1.922407971 | 3.354286683  | -0.191707269 |
| C | -1.608274246 | 2.397183179  | -1.145006104 |
| N | -0.588298889 | 2.393531422  | -2.046777517 |
| C | 0.183667189  | 3.437435823  | -1.927525228 |
| N | 1.347327029  | 3.552425797  | -2.675455774 |
| N | -0.085927949 | 4.485752368  | -1.090359099 |
| C | -1.112546962 | 4.532695041  | -0.115185301 |
| O | -1.176333263 | 5.494244792  | 0.643168161  |
| H | 0.644017004  | 5.170746178  | -0.9411348   |

|   |              |              |              |
|---|--------------|--------------|--------------|
| H | 2.141122227  | 3.70206981   | -2.041336305 |
| H | 1.488735541  | 2.677241263  | -3.169333327 |
| H | -4.003214779 | 1.051906004  | 0.550986299  |
| N | 2.061583164  | 1.296169396  | 0.360507623  |
| C | 2.148352405  | 2.69374042   | 0.464766154  |
| O | 2.948666975  | 3.30712086   | -0.268572587 |
| N | 1.314262007  | 3.328797662  | 1.321647235  |
| C | 0.415076579  | 2.637056697  | 2.014000817  |
| N | -0.474970242 | 3.35213738   | 2.764160883  |
| H | -0.590531373 | 4.306397085  | 2.434713707  |
| H | -1.365029293 | 2.890666766  | 2.907760307  |
| C | 0.353213684  | 1.217001171  | 1.993063727  |
| C | 1.192610893  | 0.588700185  | 1.134529362  |
| H | -0.347356827 | 0.62780935   | 2.57317332   |
| H | 1.179219971  | -0.490314327 | 1.005865661  |
| P | 6.306106684  | -2.164750351 | 0.776144269  |
| O | 5.902487414  | -1.467129768 | 2.029936158  |
| O | 6.978980529  | -3.493472701 | 0.686986989  |
| O | 7.229868888  | -1.054954977 | -0.064198423 |
| C | 7.663490957  | -1.447907972 | -1.340237755 |
| H | 8.342391746  | -0.66994701  | -1.717472925 |
| H | 6.815225785  | -1.537111348 | -2.030915074 |
| H | 8.196483647  | -2.406973847 | -1.29914038  |
| O | -0.955896289 | -1.619020814 | -2.431417741 |
| H | 3.220436379  | -2.004699579 | -1.988759244 |
| C | 5.77822      | 1.359597371  | -1.529509738 |
| H | 5.165794286  | 2.259095218  | -1.365123809 |
| H | 6.552838971  | 1.296036161  | -0.753564033 |
| H | 6.258629141  | 1.420435773  | -2.512300132 |
| H | -3.284166111 | -2.656300783 | -1.527126036 |
| C | -0.157361057 | -0.999317386 | -3.410014728 |
| H | -0.686609445 | -0.187022795 | -3.933247361 |
| H | 0.096278537  | -1.776584198 | -4.138168737 |
| H | 0.759384263  | -0.590684081 | -2.97135788  |

(\*7) Figure 4h

2'-OMe-modified 5'-GC-3' RNA (Structure 2), rigid strand 1

Number of atoms = 84

Total charge = -3

|   |              |              |              |
|---|--------------|--------------|--------------|
| C | -3.005016096 | 0.197304142  | -1.354520518 |
| C | -2.728239181 | -2.113714916 | -1.210035816 |
| O | -3.605685139 | -1.032741079 | -1.584294237 |
| H | -3.087020795 | 0.824652376  | -2.247740025 |
| C | -3.546123854 | -3.205342735 | -0.535067293 |
| H | -2.849490782 | -3.923671829 | -0.081586255 |
| H | -2.277621541 | -2.524938433 | -2.122732294 |
| C | -1.530222217 | -0.071175158 | -1.068163599 |
| C | -1.588689124 | -1.463555107 | -0.410936972 |
| O | -0.93219575  | -0.108696531 | -2.342671859 |

|   |              |              |              |
|---|--------------|--------------|--------------|
| H | -1.067884177 | 0.690997832  | -0.43056962  |
| O | -0.416691316 | -2.221795137 | -0.558116629 |
| H | -1.859051959 | -1.354823988 | 0.645230809  |
| H | -4.129255208 | -3.732462775 | -1.300386785 |
| O | -4.404241666 | -2.644866561 | 0.426947877  |
| P | -5.877315548 | -3.384155946 | 0.700118599  |
| O | -6.500192674 | -3.356886898 | -0.850650078 |
| C | -6.827934748 | -2.093926077 | -1.379487024 |
| H | -7.415485327 | -1.506563423 | -0.662685255 |
| H | -5.926490888 | -1.527114204 | -1.646157579 |
| H | -7.422783163 | -2.25658923  | -2.289223275 |
| O | -5.683308776 | -4.827417479 | 1.013877672  |
| O | -6.629669723 | -2.404250095 | 1.540447353  |
| P | 0.692320426  | -2.357747054 | 0.690433746  |
| O | 0.246171811  | -1.472246139 | 1.808547898  |
| O | 1.062274668  | -3.795047196 | 0.78630561   |
| O | 1.984464777  | -1.530929407 | 0.02462169   |
| C | 2.907539904  | -2.084860983 | -0.873476131 |
| C | 3.944095881  | -1.017182442 | -1.225477089 |
| H | 2.39943847   | -2.409068815 | -1.793117436 |
| H | 3.415982065  | -2.951963374 | -0.433385511 |
| H | 4.599741343  | -1.410840957 | -2.013899434 |
| C | 4.853230665  | -0.534307203 | -0.081691051 |
| O | 3.27826366   | 0.146802086  | -1.729066248 |
| C | 5.046807427  | 0.96463045   | -0.41703866  |
| C | 3.737207902  | 1.33061523   | -1.129442928 |
| H | 3.93362394   | 2.076778507  | -1.896201024 |
| O | 6.03637934   | 1.185843664  | -1.399577216 |
| O | 6.033138425  | -1.291677668 | -0.075151214 |
| H | 5.241898217  | 1.560851249  | 0.480740205  |
| H | 4.332053114  | -0.622890065 | 0.879463518  |
| N | -3.700807328 | 0.930828553  | -0.277466162 |
| C | -4.802107962 | 0.565891868  | 0.473907207  |
| N | -5.322490606 | 1.575025999  | 1.133050694  |
| C | -4.532428002 | 2.650855149  | 0.804947371  |
| C | -3.513137091 | 2.262073154  | -0.056382787 |
| N | -2.506955792 | 3.017253169  | -0.589758228 |
| C | -2.539088264 | 4.249250242  | -0.189253324 |
| N | -1.501082349 | 5.143669383  | -0.447021177 |
| N | -3.532315189 | 4.753561518  | 0.616276719  |
| C | -4.615581005 | 4.031050568  | 1.194652676  |
| O | -5.408694817 | 4.629134183  | 1.905931203  |
| H | -3.430160598 | 5.697193655  | 0.963649172  |
| H | -1.750686732 | 5.939674855  | -1.0203009   |
| H | -0.645544895 | 4.680895774  | -0.763046793 |
| H | -5.142502258 | -0.463344499 | 0.521054256  |
| N | 2.696408717  | 1.942516763  | -0.278925859 |
| C | 2.20893904   | 3.234358391  | -0.620730643 |
| O | 2.699291348  | 3.849774047  | -1.560782239 |



|   |              |              |              |
|---|--------------|--------------|--------------|
| N | 1.190431388  | 3.74757176   | 0.143448837  |
| C | 0.675543482  | 3.038741951  | 1.136351581  |
| N | -0.26230397  | 3.653765734  | 1.92190485   |
| H | -0.654562688 | 4.499860027  | 1.528494322  |
| H | -0.914836163 | 3.050092275  | 2.400830898  |
| C | 1.071881277  | 1.710650461  | 1.43590091   |
| C | 2.092683869  | 1.215144252  | 0.696245004  |
| H | 0.581024227  | 1.071115322  | 2.159688799  |
| H | 2.411065757  | 0.190330111  | 0.824513525  |
| P | 6.952331525  | -1.352742606 | 1.330219411  |
| O | 6.943954401  | 0.003178105  | 1.958254394  |
| O | 6.654608128  | -2.61894169  | 2.058546917  |
| O | 8.418576461  | -1.517849873 | 0.554540681  |
| C | 8.628263828  | -2.728479617 | -0.127214744 |
| H | 9.696298182  | -2.796089193 | -0.375875408 |
| H | 8.046685579  | -2.765172172 | -1.059883939 |
| H | 8.343443843  | -3.586374959 | 0.493868741  |
| C | 0.439666501  | 0.21840128   | -2.310365988 |
| C | 7.376118919  | 1.213066068  | -0.949766045 |
| H | 0.859090116  | -0.031579257 | -3.288155144 |
| H | 0.580755037  | 1.296368931  | -2.130131575 |
| H | 0.968319695  | -0.341974801 | -1.542379596 |
| H | 7.867660978  | 0.249544688  | -1.110809256 |
| H | 7.891888914  | 1.99581962   | -1.523843864 |
| H | 7.439653112  | 1.426225177  | 0.122087578  |

(\*8) Figure 4i

2'-OMe-modified 5'-GC-3' RNA (Structure 4), stretch type

Number of atoms = 84

Total charge = -3

|   |              |              |              |
|---|--------------|--------------|--------------|
| C | -3.413604308 | 0.408600816  | -0.821026773 |
| C | -2.621601187 | -1.708612594 | -0.245730537 |
| O | -3.686238273 | -0.95368055  | -0.856618831 |
| H | -3.537958348 | 0.850555974  | -1.813681243 |
| C | -3.222788542 | -2.857680358 | 0.543790115  |
| H | -2.410594151 | -3.365593235 | 1.08048836   |
| C | -1.958268832 | 0.568306151  | -0.377128618 |
| C | -1.778648006 | -0.677261594 | 0.513627465  |
| O | -1.233313261 | 0.502465321  | -1.582880378 |
| H | -1.757401331 | 1.500278041  | 0.161927524  |
| O | -0.458119273 | -1.128077862 | 0.629056173  |
| H | -2.229254836 | -0.487056964 | 1.497925663  |
| H | -3.667375154 | -3.571185574 | -0.161375573 |
| O | -4.198342523 | -2.37993619  | 1.436292603  |
| P | -5.471059553 | -3.400225363 | 1.818250284  |
| O | -6.153054076 | -3.5608101   | 0.302990191  |
| C | -6.72001484  | -2.40187486  | -0.261950309 |
| H | -7.320550642 | -1.855633602 | 0.476084273  |
| H | -5.943264419 | -1.732998489 | -0.653748993 |

|   |              |              |              |
|---|--------------|--------------|--------------|
| H | -7.366937946 | -2.716414926 | -1.092942954 |
| O | -4.953800148 | -4.755277624 | 2.157634156  |
| O | -6.365993955 | -2.567148855 | 2.674288283  |
| P | 0.513837161  | -0.413940706 | 1.804306701  |
| O | 0.354748467  | 1.073689497  | 1.705370354  |
| O | 0.388666635  | -1.187058105 | 3.067399614  |
| O | 1.965545678  | -0.727537432 | 1.063749055  |
| C | 2.348081185  | -1.998672777 | 0.600891486  |
| C | 3.502320671  | -1.847213182 | -0.381277693 |
| H | 1.504632393  | -2.481921497 | 0.093457863  |
| H | 2.677246749  | -2.638822793 | 1.429797662  |
| C | 4.833387617  | -1.312599844 | 0.161316154  |
| O | 3.122463151  | -0.917820818 | -1.413107102 |
| C | 5.436803896  | -0.667556991 | -1.095414933 |
| C | 4.189951862  | -0.091098445 | -1.780154937 |
| H | 4.310758362  | -0.092134969 | -2.864246935 |
| O | 5.969356197  | -1.662059603 | -1.943524438 |
| O | 5.58562793   | -2.341044224 | 0.732694778  |
| H | 6.188805918  | 0.084622243  | -0.83994327  |
| H | 4.65082253   | -0.516034242 | 0.893332088  |
| N | -4.377010606 | 1.109040851  | 0.048158916  |
| C | -5.150010901 | 0.641080544  | 1.095671179  |
| N | -5.931337994 | 1.567339597  | 1.599262398  |
| C | -5.661000123 | 2.693608127  | 0.859768532  |
| C | -4.696229518 | 2.421001979  | -0.103277629 |
| N | -4.172192915 | 3.259508372  | -1.046586955 |
| C | -4.638357652 | 4.463588463  | -0.956330567 |
| N | -4.155384904 | 5.470038526  | -1.796137971 |
| N | -5.580621907 | 4.853075798  | -0.044017106 |
| C | -6.193535535 | 4.023439872  | 0.948149528  |
| O | -7.02258074  | 4.525736295  | 1.689523832  |
| H | -5.811123808 | 5.833142557  | 0.043635581  |
| H | -4.887976954 | 5.987513559  | -2.268075639 |
| H | -3.513974278 | 5.060761595  | -2.465557439 |
| H | -5.087621851 | -0.392107652 | 1.425715048  |
| N | 3.911778     | 1.318111877  | -1.418554393 |
| C | 4.514100342  | 2.321576487  | -2.214694196 |
| O | 5.281326341  | 1.993724454  | -3.116595221 |
| N | 4.181300213  | 3.62339926   | -1.947835601 |
| C | 3.378289523  | 3.896658851  | -0.93799583  |
| N | 3.1073738    | 5.233623706  | -0.714809338 |
| H | 3.306992545  | 5.814682058  | -1.516763839 |
| H | 2.229551657  | 5.429643979  | -0.256538852 |
| C | 2.806930436  | 2.919650062  | -0.087467355 |
| C | 3.094488054  | 1.624408664  | -0.385988591 |
| H | 2.131296314  | 3.137370033  | 0.730685043  |
| H | 2.658679511  | 0.796229676  | 0.168467427  |
| P | 7.052801172  | -1.9516351   | 1.450479764  |
| O | 7.052452897  | -0.501293922 | 1.796285856  |

|   |              |              |              |
|---|--------------|--------------|--------------|
| O | 7.35813801   | -3.075036858 | 2.382520586  |
| O | 8.054799438  | -2.085272251 | 0.12102187   |
| C | 8.154130758  | -3.363434713 | -0.452735609 |
| H | 8.884089771  | -3.305714845 | -1.272272725 |
| H | 7.189340165  | -3.683109282 | -0.866335036 |
| H | 8.492028253  | -4.103996388 | 0.283909008  |
| H | -1.984145051 | -2.120483718 | -1.039933205 |
| H | 3.697603016  | -2.825952219 | -0.840370133 |
| C | 0.132416191  | 0.871783892  | -1.502899231 |
| C | 7.014816862  | -1.164363585 | -2.741009236 |
| H | 0.774566815  | 0.00755409   | -1.317136374 |
| H | 0.2962899    | 1.59369205   | -0.697507499 |
| H | 0.398312112  | 1.320416042  | -2.468081214 |
| H | 7.289540454  | -1.961259438 | -3.440763765 |
| H | 7.883115549  | -0.918249525 | -2.114712369 |
| H | 6.705886123  | -0.271892494 | -3.30485298  |

### 3.2 Modeling of 5'-AAA-3' RNA with AGO protein binding pocket

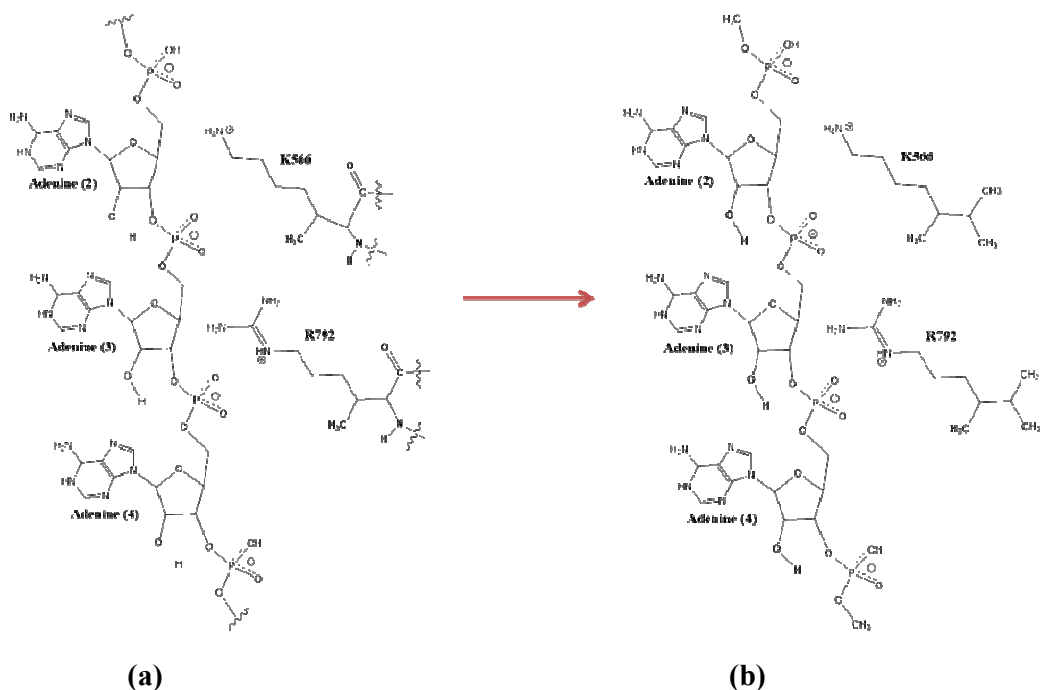

**Figure S4.**

(a) Schematic drawing of a part of AGO protein binding pocket (5'-AAA-3' RNA with R792 and K566) taken from crystal structure of Schirle *et al.*<sup>12</sup> This structure is shown in Figure 5(a).

(b) Schematic drawing of a structure used in the geometry optimization. Each of 5'- and 3'-terminal phosphates was capped with a methyl group, and the parts of main chain (C=O and N-H) of R792 and K566 were replaced with methyl groups in order to avoid artificial interactions. The full geometry optimization of this binding pocket model was performed for each of unmodified, 2'-OMe-modified and LNA-modified RNA, and the optimized structure is shown in Figure 5 (b), (c) and (d), respectively.

### 3.3 Total energy of the model of 5'-AAA-3' RNA with AGO protein binding pocket

Table S2. Total energy of 5'-AAA-3' RNA with AGO protein

|                                   | Total energy (a.u) |
|-----------------------------------|--------------------|
| unmodified RNA (Fig 5b) (*1)      | -5782.749051       |
| 2'-OMe-modified RNA (Fig 5c) (*2) | -5822.029741       |
| LNA-modified RNA (Fig 5d) (*3)    | -5820.815823       |

(\*1) Figure 5b

Unmodified 5'-AAA-3' RNA on AGO protein

Number of atoms = 165

Total charge = -2

|   |              |             |             |
|---|--------------|-------------|-------------|
| C | -16.24967915 | 32.92274267 | 35.33229002 |
| C | -17.59590745 | 33.66001733 | 35.27139222 |
| C | -18.81101583 | 32.79135858 | 35.5954309  |
| C | -20.15121381 | 33.53279814 | 35.56981851 |
| C | -20.53639593 | 34.1640575  | 34.23437517 |
| N | -20.62638412 | 33.18033917 | 33.1315648  |
| C | -21.36160614 | 32.91104565 | 40.13820666 |
| C | -20.90725687 | 31.4491401  | 40.07278831 |
| C | -19.9323011  | 31.14790912 | 38.93346769 |
| C | -19.77305486 | 29.64416077 | 38.66829266 |
| N | -20.97174174 | 29.01085281 | 38.14506164 |
| C | -21.42524405 | 29.21840108 | 36.907786   |
| N | -20.65100277 | 29.81752092 | 35.97152193 |
| N | -22.62535848 | 28.77836976 | 36.54230765 |
| O | -23.5670215  | 34.83717675 | 30.99097317 |
| C | -23.49206704 | 35.70702661 | 32.09638017 |
| C | -24.53057699 | 35.36865623 | 33.14204527 |
| O | -25.81147416 | 35.84619566 | 32.72368773 |
| C | -24.77625388 | 33.88932907 | 33.41351451 |
| O | -23.71991032 | 33.32842715 | 34.17261985 |
| C | -26.14011531 | 33.95520765 | 34.11515314 |
| O | -26.0397906  | 34.49592261 | 35.40488645 |
| C | -26.82889757 | 35.03650065 | 33.26557135 |
| N | -27.63223218 | 34.50707177 | 32.17362567 |
| C | -27.21060368 | 33.98781912 | 30.96925184 |
| N | -28.18496388 | 33.53411928 | 30.22118897 |
| C | -29.3153312  | 33.76875057 | 30.97805917 |
| C | -30.67637914 | 33.50230817 | 30.77014716 |
| N | -31.12482694 | 32.91569488 | 29.62270698 |
| N | -31.56566593 | 33.85029999 | 31.70958078 |
| C | -31.10612837 | 34.46621311 | 32.81586071 |
| N | -29.8546281  | 34.76077244 | 33.14027033 |
| C | -28.99560478 | 34.37828165 | 32.18846049 |
| P | -23.70253331 | 31.69244715 | 34.35998512 |
| O | -22.2152041  | 31.35031031 | 34.32952182 |
| O | -24.68864512 | 31.00770191 | 33.50002929 |
| O | -24.20281135 | 31.53390654 | 35.90800201 |
| C | -23.5528723  | 32.19984818 | 36.97143992 |

|   |              |             |             |
|---|--------------|-------------|-------------|
| C | -24.51817544 | 32.28454538 | 38.1337041  |
| O | -25.66027489 | 33.0364464  | 37.72843699 |
| C | -25.06121582 | 30.94179128 | 38.61882849 |
| O | -24.16661208 | 30.39197765 | 39.55033292 |
| C | -26.43580373 | 31.33804495 | 39.18156399 |
| O | -26.32662819 | 31.89690549 | 40.46030325 |
| C | -26.86000836 | 32.45145718 | 38.21121183 |
| N | -27.67221067 | 32.01654265 | 37.08914225 |
| C | -27.34846313 | 31.1484916  | 36.06416837 |
| N | -28.28706167 | 31.02268258 | 35.16329567 |
| C | -29.28966319 | 31.85696508 | 35.6129867  |
| C | -30.56468418 | 32.14606286 | 35.11616285 |
| N | -31.04724203 | 31.503784   | 34.00019726 |
| N | -31.33928273 | 33.01523508 | 35.76630486 |
| C | -30.85724122 | 33.55294277 | 36.89753844 |
| N | -29.68510024 | 33.34718319 | 37.48863542 |
| C | -28.93388365 | 32.48598366 | 36.79859156 |
| P | -24.04683018 | 28.74804918 | 39.71468111 |
| O | -22.65047588 | 28.52488688 | 40.22594937 |
| O | -24.49689308 | 28.10503388 | 38.43286617 |
| O | -25.16591097 | 28.42172017 | 40.82700105 |
| C | -25.04569258 | 28.95234431 | 42.14981514 |
| C | -26.42295649 | 28.93426009 | 42.77773238 |
| O | -27.28583641 | 29.77705988 | 41.98155168 |
| C | -27.11322296 | 27.55608821 | 42.8110938  |
| O | -27.06208603 | 26.87136798 | 44.03242894 |
| C | -28.59442937 | 27.90846348 | 42.56796124 |
| O | -29.21017244 | 28.22224057 | 43.78867361 |
| C | -28.53516612 | 29.18209501 | 41.7222898  |
| N | -28.72156683 | 28.95575069 | 40.29619635 |
| C | -27.96667029 | 28.20726555 | 39.41040223 |
| N | -28.43723435 | 28.20703153 | 38.19013244 |
| C | -29.5710966  | 28.9918625  | 38.26662376 |
| C | -30.53643034 | 29.37179705 | 37.31568961 |
| N | -30.50701206 | 28.92728544 | 36.02855435 |
| N | -31.53977373 | 30.17257758 | 37.70099556 |
| C | -31.57800445 | 30.57211914 | 38.97933547 |
| N | -30.75133227 | 30.27156858 | 39.97492378 |
| C | -29.7612816  | 29.4738703  | 39.55811358 |
| P | -25.60011565 | 26.57384947 | 44.84135763 |
| O | -25.95508355 | 25.567106   | 45.87603114 |
| O | -24.92844404 | 27.88045449 | 45.09339602 |
| O | -24.780584   | 25.87643204 | 43.58840661 |
| H | -16.29889367 | 32.07678078 | 34.63068711 |
| H | -17.70737896 | 34.09095561 | 34.26671629 |
| H | -17.56903567 | 34.51214533 | 35.9671424  |
| H | -18.6923275  | 32.36657956 | 36.59910477 |
| H | -18.83920192 | 31.93443487 | 34.90442658 |
| H | -20.94831478 | 32.83770456 | 35.85147597 |

|   |              |             |             |
|---|--------------|-------------|-------------|
| H | -20.13582337 | 34.33015087 | 36.32360956 |
| H | -19.84173491 | 34.9482855  | 33.92097992 |
| H | -21.53187943 | 34.60336646 | 34.3195492  |
| H | -21.31658857 | 32.4364953  | 33.40037926 |
| H | -19.72955778 | 32.72738496 | 32.96228794 |
| H | -20.89883515 | 33.7111906  | 32.19475651 |
| H | -21.83564273 | 33.15116193 | 39.17364246 |
| H | -20.44234219 | 31.16921633 | 41.02938068 |
| H | -21.79275238 | 30.81330271 | 39.9742443  |
| H | -18.93914108 | 31.56742617 | 39.14563774 |
| H | -20.28916639 | 31.64316678 | 38.01852752 |
| H | -19.54718749 | 29.13094797 | 39.60698508 |
| H | -18.92726235 | 29.44612629 | 37.99569952 |
| H | -21.63976739 | 28.67325814 | 38.87344852 |
| H | -21.17044948 | 30.3119672  | 35.2288011  |
| H | -19.83358514 | 30.30316683 | 36.30280664 |
| H | -23.32549734 | 28.43919904 | 37.23708241 |
| H | -22.96851744 | 29.04310766 | 35.62995401 |
| H | -23.65372191 | 36.74855566 | 31.78037379 |
| H | -22.49929254 | 35.64963335 | 32.55486416 |
| H | -24.25325767 | 35.86011711 | 34.08548997 |
| H | -24.86556322 | 33.349812   | 32.46730244 |
| H | -26.67734226 | 33.00053923 | 34.0912349  |
| H | -25.79349446 | 33.80943555 | 36.04831488 |
| H | -27.50850281 | 35.61623354 | 33.89533887 |
| H | -26.16313249 | 34.0029546  | 30.69348267 |
| H | -32.05297015 | 32.5232629  | 29.65896063 |
| H | -30.43810009 | 32.43025104 | 29.06517763 |
| H | -31.86127273 | 34.71955024 | 33.55516074 |
| H | -23.25126805 | 33.20914086 | 36.6645363  |
| H | -22.66265448 | 31.64144169 | 37.2924826  |
| H | -24.03323997 | 32.79256494 | 38.97459476 |
| H | -25.19045031 | 30.25220557 | 37.77937693 |
| H | -27.14430234 | 30.50891366 | 39.15510325 |
| H | -26.60031487 | 31.20903744 | 41.09513404 |
| H | -27.45187351 | 33.20202275 | 38.73701661 |
| H | -26.38241668 | 30.6683044  | 36.00989419 |
| H | -31.80859757 | 31.98517147 | 33.53817263 |
| H | -30.3232619  | 31.18758188 | 33.36694478 |
| H | -31.52189902 | 34.25387873 | 37.39721119 |
| H | -24.67825618 | 29.98397624 | 42.10132251 |
| H | -24.36480476 | 28.34565903 | 42.74803014 |
| H | -26.35709816 | 29.33412475 | 43.79198062 |
| H | -26.7234997  | 26.93122447 | 41.99835599 |
| H | -29.13421779 | 27.1089689  | 42.04195629 |
| H | -28.69102722 | 27.72360656 | 44.44738485 |
| H | -29.33895936 | 29.86269068 | 42.01126083 |
| H | -27.04298107 | 27.73547538 | 39.7188959  |
| H | -31.04374961 | 29.4928533  | 35.37962107 |

|   |              |             |             |
|---|--------------|-------------|-------------|
| H | -29.58942701 | 28.66848736 | 35.68983415 |
| H | -32.40344538 | 31.23467804 | 39.23066008 |
| C | -25.20013642 | 24.59516951 | 43.17808342 |
| H | -24.49774854 | 24.25168141 | 42.41227254 |
| H | -25.20787593 | 23.89498798 | 44.02095419 |
| H | -26.21020892 | 24.62164155 | 42.74452385 |
| P | -22.18952639 | 34.57923466 | 30.09195013 |
| O | -21.01400141 | 34.63563111 | 31.07903985 |
| O | -22.41481749 | 33.38839044 | 29.23450512 |
| C | -22.10656837 | 36.12146302 | 29.12007527 |
| H | -21.21028548 | 36.10922657 | 28.49328502 |
| H | -22.06023136 | 36.99643959 | 29.7763866  |
| H | -22.98702067 | 36.19973709 | 28.47682641 |
| C | -20.19390828 | 33.88338187 | 40.32787032 |
| C | -22.41141206 | 33.08624101 | 41.23802228 |
| H | -19.48342669 | 33.83940833 | 39.49322184 |
| H | -20.55298451 | 34.91645852 | 40.40278779 |
| H | -19.6445099  | 33.65141647 | 41.24979723 |
| H | -23.25699014 | 32.4063121  | 41.09085911 |
| H | -22.79736805 | 34.11222633 | 41.25824279 |
| H | -21.97574061 | 32.87059865 | 42.22194079 |
| C | -15.9522485  | 32.3651176  | 36.72777494 |
| C | -15.11909566 | 33.84942698 | 34.87695056 |
| H | -14.9660489  | 31.88847844 | 36.75466836 |
| H | -15.95594545 | 33.1706058  | 37.47331423 |
| H | -16.68612186 | 31.61593246 | 37.04141647 |
| H | -14.15515032 | 33.3283065  | 34.87239011 |
| H | -15.03158602 | 34.70949029 | 35.55292854 |
| H | -15.30212817 | 34.23427613 | 33.86744757 |

(\*2) Figure 5c

2'-OMe-modified 5'-AAA-3' RNA on AGO protein

Number of atoms = 168

Total charge = -2

|   |              |              |              |
|---|--------------|--------------|--------------|
| C | 4.114111161  | -8.210275134 | -0.233711796 |
| C | 4.225825873  | -6.844435995 | 0.459739766  |
| C | 3.189829015  | -5.815642806 | 0.007571555  |
| C | 3.312820985  | -4.446293978 | 0.683296454  |
| C | 4.629149931  | -3.709593654 | 0.45031359   |
| N | 4.89868762   | -3.446697062 | -0.981927751 |
| C | -0.533788123 | -4.125929109 | 3.125586604  |
| C | -1.328660231 | -4.660273227 | 1.929051797  |
| C | -0.479362813 | -5.408625388 | 0.900929823  |
| C | -1.204096478 | -5.630510302 | -0.433977024 |
| N | -1.446031491 | -4.40632333  | -1.178537251 |
| C | -0.479884805 | -3.709642837 | -1.778606678 |
| N | 0.750923535  | -4.24221284  | -1.979604866 |
| N | -0.721319798 | -2.492765497 | -2.253474602 |



|   |              |              |              |
|---|--------------|--------------|--------------|
| O | 7.018016398  | -0.146091285 | -0.718486744 |
| C | 6.672266322  | -0.383198656 | 0.625950589  |
| C | 5.492462519  | 0.462314119  | 1.046916495  |
| O | 5.919359477  | 1.812211214  | 1.236412272  |
| C | 4.34392801   | 0.586092405  | 0.051599916  |
| O | 3.557254199  | -0.592630034 | 0.030191239  |
| C | 3.640581129  | 1.839376994  | 0.589207297  |
| O | 2.968069069  | 1.588521588  | 1.794125381  |
| C | 4.855140406  | 2.697415417  | 0.976395191  |
| N | 5.267149271  | 3.640388919  | -0.051389136 |
| C | 5.882255823  | 3.387574596  | -1.258212451 |
| N | 6.047399095  | 4.454215745  | -1.999385053 |
| C | 5.511030568  | 5.470473801  | -1.234457309 |
| C | 5.343340446  | 6.845176134  | -1.454343186 |
| N | 5.770710567  | 7.445585717  | -2.601640386 |
| N | 4.764796087  | 7.596888792  | -0.507381427 |
| C | 4.389936036  | 6.991903277  | 0.636198439  |
| N | 4.478292942  | 5.710070897  | 0.961962031  |
| C | 5.032132205  | 4.989135464  | -0.018957318 |
| P | 2.447871189  | -0.750661904 | -1.182357221 |
| O | 2.565618205  | -2.217778161 | -1.586153043 |
| O | 2.530371835  | 0.34879291   | -2.165346297 |
| O | 1.043367583  | -0.586209285 | -0.363176438 |
| C | 0.733513527  | -1.403587196 | 0.747233509  |
| C | -0.21641222  | -0.640514441 | 1.645976946  |
| O | 0.421108865  | 0.564787881  | 2.061417926  |
| C | -1.532404814 | -0.216943136 | 0.987498042  |
| O | -2.478137707 | -1.245477285 | 1.138095399  |
| C | -1.862949487 | 1.084463963  | 1.739742813  |
| C | -0.467709329 | 1.666961339  | 2.004768451  |
| N | -0.003607776 | 2.629492814  | 1.021728449  |
| C | 0.196919656  | 2.470773449  | -0.336002163 |
| N | 0.69331796   | 3.530018573  | -0.921144286 |
| C | 0.840245425  | 4.439130084  | 0.107022261  |
| C | 1.27785024   | 5.771245002  | 0.128729539  |
| N | 1.677439161  | 6.407457393  | -1.008954082 |
| N | 1.250137102  | 6.442042816  | 1.286973211  |
| C | 0.826446396  | 5.788420641  | 2.380595955  |
| N | 0.394474167  | 4.537535546  | 2.494707677  |
| C | 0.416693066  | 3.906100656  | 1.317751538  |
| P | -3.442556089 | -1.708930323 | -0.128437209 |
| O | -3.574930552 | -3.201780246 | -0.015161233 |
| O | -2.889020962 | -1.089430148 | -1.383780056 |
| O | -4.830615452 | -0.968821952 | 0.199242377  |
| C | -5.90039506  | -1.586528307 | 0.920219748  |
| C | -7.071689533 | -0.627077936 | 0.864244001  |
| O | -6.696278116 | 0.606849105  | 1.499624415  |
| C | -7.508218386 | -0.2685637   | -0.57285171  |
| O | -8.695530686 | -0.871874631 | -1.012971555 |

|   |              |              |              |
|---|--------------|--------------|--------------|
| C | -7.775054088 | 1.249235793  | -0.497344235 |
| O | -9.11502887  | 1.482955851  | -0.151083926 |
| C | -6.893222038 | 1.711436773  | 0.666491741  |
| N | -5.629011537 | 2.317056404  | 0.238593931  |
| C | -4.691318736 | 1.879239487  | -0.67440367  |
| N | -3.68209903  | 2.698918636  | -0.83322308  |
| C | -3.965698791 | 3.742343977  | 0.02557647   |
| C | -3.290309068 | 4.939631476  | 0.321337169  |
| N | -2.159876072 | 5.307645194  | -0.326405134 |
| N | -3.805550271 | 5.762044132  | 1.248020395  |
| C | -4.958214346 | 5.405003336  | 1.831776839  |
| N | -5.706558358 | 4.326695613  | 1.626376899  |
| C | -5.157714805 | 3.52119153   | 0.706173137  |
| P | -8.847532995 | -2.559822556 | -1.074695446 |
| O | -10.06266149 | -2.788413008 | -1.901246879 |
| O | -8.610518115 | -3.106980109 | 0.291717646  |
| O | -7.474131799 | -2.883347422 | -1.935519511 |
| H | 4.213125463  | -8.043888466 | -1.316671595 |
| H | 5.237153604  | -6.453234522 | 0.283443419  |
| H | 4.13830674   | -6.986038917 | 1.547465715  |
| H | 2.185199394  | -6.198391962 | 0.222369967  |
| H | 3.242104108  | -5.704857047 | -1.086839083 |
| H | 2.504322263  | -3.796854118 | 0.331820878  |
| H | 3.181536325  | -4.566169528 | 1.7662426    |
| H | 5.492022329  | -4.246254357 | 0.853863463  |
| H | 4.582631964  | -2.728751428 | 0.927288967  |
| H | 4.122595453  | -2.852584515 | -1.362783433 |
| H | 4.924769766  | -4.310876392 | -1.521389299 |
| H | 5.907145271  | -2.988349551 | -1.087332348 |
| H | 0.221604364  | -3.42668435  | 2.734435431  |
| H | -2.126858434 | -5.325075587 | 2.290097027  |
| H | -1.842469903 | -3.823097317 | 1.444743169  |
| H | -0.169584317 | -6.387869246 | 1.291201394  |
| H | 0.443235234  | -4.839427764 | 0.720314544  |
| H | -2.188685874 | -6.068401118 | -0.248722528 |
| H | -0.660896815 | -6.34708257  | -1.064865252 |
| H | -2.325056998 | -3.909664986 | -0.915850409 |
| H | 1.511598572  | -3.546436801 | -1.998909616 |
| H | 0.967370815  | -5.081059566 | -1.465761926 |
| H | -1.582760182 | -1.963134439 | -1.994474432 |
| H | 0.059424016  | -1.964032143 | -2.615154938 |
| H | 7.515513983  | -0.1468961   | 1.292344537  |
| H | 6.420582408  | -1.438838062 | 0.7728188    |
| H | 5.097211015  | 0.0691799    | 1.99454232   |
| H | 4.740065383  | 0.776597858  | -0.948734908 |
| H | 3.0050509    | 2.322252362  | -0.161910513 |
| H | 2.159432109  | 1.072975115  | 1.631577884  |
| H | 4.609783496  | 3.296814115  | 1.856972103  |
| H | 6.213838564  | 2.38912176   | -1.515422863 |

|   |              |              |              |
|---|--------------|--------------|--------------|
| H | 5.39139957   | 8.359300503  | -2.795613995 |
| H | 5.958578221  | 6.841843914  | -3.387767321 |
| H | 3.920695032  | 7.638503991  | 1.372490708  |
| H | 1.643812292  | -1.657926711 | 1.304506096  |
| H | 0.244730439  | -2.331400542 | 0.42045169   |
| H | -0.449150835 | -1.246084735 | 2.52900888   |
| H | -1.384746616 | -0.001333677 | -0.074822583 |
| H | -2.477077351 | 1.768783064  | 1.146000909  |
| H | -0.457319386 | 2.193651673  | 2.960195509  |
| H | -0.007024498 | 1.535482998  | -0.83600083  |
| H | 2.264896069  | 7.220045706  | -0.878871536 |
| H | 1.931269061  | 5.802534506  | -1.777423462 |
| H | 0.834109038  | 6.372267483  | 3.298224982  |
| H | -5.59467029  | -1.750135092 | 1.959985     |
| H | -6.182188431 | -2.537103694 | 0.463880116  |
| H | -7.913913395 | -1.069091291 | 1.401304142  |
| H | -6.689989143 | -0.483592083 | -1.269957633 |
| H | -7.514087601 | 1.767323428  | -1.430807652 |
| H | -9.5763887   | 0.672428626  | -0.437848279 |
| H | -7.396716424 | 2.500101493  | 1.229414217  |
| H | -4.780964175 | 0.921500369  | -1.166732782 |
| H | -1.613407128 | 6.050198722  | 0.082794806  |
| H | -1.667097897 | 4.617905321  | -0.876371572 |
| H | -5.330709584 | 6.103278591  | 2.579156664  |
| C | -7.460909538 | -2.502735373 | -3.292466159 |
| H | -6.529699686 | -2.877341611 | -3.728733034 |
| H | -8.321022879 | -2.921738912 | -3.826820383 |
| H | -7.486525948 | -1.409050572 | -3.404277386 |
| P | 7.851150452  | -1.329279053 | -1.540525879 |
| O | 7.318004     | -2.669937074 | -1.012017351 |
| O | 7.805524604  | -1.002209682 | -2.987942369 |
| C | 9.52670485   | -1.138952914 | -0.84456593  |
| H | 10.1910475   | -1.885019097 | -1.289740367 |
| H | 9.521152026  | -1.281627026 | 0.240720994  |
| H | 9.909415099  | -0.141428252 | -1.075742781 |
| O | -2.4368334   | 0.817769383  | 2.992658802  |
| C | -3.852113226 | 0.90844803   | 2.977285189  |
| H | -4.174637119 | 1.957574554  | 2.91207415   |
| H | -4.207252796 | 0.482946549  | 3.918286537  |
| H | -4.288443669 | 0.355508469  | 2.143944078  |
| C | 5.25923431   | -9.123930827 | 0.211061792  |
| C | 2.763096324  | -8.886116084 | 0.020567736  |
| C | 0.213395721  | -5.228982267 | 3.880549397  |
| C | -1.461657793 | -3.346908028 | 4.060793868  |
| H | 6.234678713  | -8.666807454 | 0.010748823  |
| H | 5.222844277  | -10.08782563 | -0.308931554 |
| H | 5.19645539   | -9.322549208 | 1.288523959  |
| H | 1.926160862  | -8.303667014 | -0.377732225 |
| H | 2.596069691  | -9.020469334 | 1.097048672  |

|   |              |              |              |
|---|--------------|--------------|--------------|
| H | 2.72730604   | -9.875097925 | -0.449765686 |
| H | -0.48744566  | -5.995745015 | 4.236384308  |
| H | 0.959102469  | -5.725491112 | 3.247901762  |
| H | 0.73573719   | -4.821457887 | 4.753807075  |
| H | -0.90126212  | -2.874370395 | 4.876014978  |
| H | -2.205074421 | -4.019027976 | 4.508177301  |
| H | -2.004742292 | -2.566135659 | 3.517736764  |

(\*3) Figure 5d

LNA-modified 5'-AAA-3' RNA on AGO protein

Number of atoms = 166

Total charge = -2

|   |              |              |              |
|---|--------------|--------------|--------------|
| C | 5.171041416  | 6.978922038  | 0.920963657  |
| C | 5.441188284  | 5.930059692  | -0.168091598 |
| C | 4.433051264  | 4.781103134  | -0.196399881 |
| C | 4.778029032  | 3.638239164  | -1.152718605 |
| C | 6.078482756  | 2.897689496  | -0.849271707 |
| N | 6.185513995  | 2.455495256  | 0.561523753  |
| C | -0.435230345 | 5.3844742    | -2.227296782 |
| C | -0.822517225 | 5.616246642  | -0.763916679 |
| C | 0.352991032  | 5.95818722   | 0.151752935  |
| C | -0.003869088 | 5.850795148  | 1.641518896  |
| N | -0.300960652 | 4.49854497   | 2.082749396  |
| C | 0.637010159  | 3.561978297  | 2.250329074  |
| N | 1.949754007  | 3.885217388  | 2.220847299  |
| N | 0.295789384  | 2.308446361  | 2.533539252  |
| O | 7.224751885  | -1.420437521 | -0.068646198 |
| C | 6.973964272  | -0.968922243 | -1.377392804 |
| C | 5.551355539  | -1.246303425 | -1.811086054 |
| O | 5.421969425  | -2.621045968 | -2.208119345 |
| C | 4.455173405  | -1.099433549 | -0.762146889 |
| O | 4.170224051  | 0.243828073  | -0.436901636 |
| C | 3.316267059  | -1.845867108 | -1.461642002 |
| O | 2.821129875  | -1.091115763 | -2.537295565 |
| C | 4.101185641  | -3.055196245 | -2.000043589 |
| N | 4.097151672  | -4.158574968 | -1.046116677 |
| C | 4.89290156   | -4.340535055 | 0.065888815  |
| N | 4.464560232  | -5.280779222 | 0.869340242  |
| C | 3.30630958   | -5.727115374 | 0.265973662  |
| C | 2.312939941  | -6.63364765  | 0.66365641   |
| N | 2.401794472  | -7.329402775 | 1.833195238  |
| N | 1.257862929  | -6.833384142 | -0.136548704 |
| C | 1.188132306  | -6.136771153 | -1.286112687 |
| N | 2.025561622  | -5.223127088 | -1.751119072 |
| C | 3.06338399   | -5.04804435  | -0.922925463 |
| P | 3.241706691  | 0.48200873   | 0.904977672  |
| O | 3.60895168   | 1.912067312  | 1.285684007  |
| O | 3.307341804  | -0.643642393 | 1.858319158  |

|   |              |              |              |
|---|--------------|--------------|--------------|
| O | 1.717523467  | 0.502784956  | 0.304369446  |
| C | 1.365941421  | 1.328843385  | -0.786614712 |
| C | 0.088780905  | 0.793167163  | -1.378629056 |
| O | 0.261963064  | -0.596311445 | -1.725455097 |
| C | -1.187791216 | 0.758731686  | -0.523879347 |
| O | -1.622751625 | 2.063675443  | -0.265592433 |
| C | -1.951311274 | 0.04581012   | -1.642844986 |
| C | -1.036453478 | -1.156095944 | -1.902649385 |
| N | -1.158906209 | -2.311833703 | -1.034593991 |
| C | -0.362556494 | -2.691550217 | 0.02856579   |
| N | -0.554231301 | -3.925265228 | 0.414776919  |
| C | -1.530488694 | -4.398726666 | -0.443789255 |
| C | -2.130194767 | -5.655720234 | -0.631547635 |
| N | -1.78760348  | -6.759699996 | 0.104288826  |
| N | -3.081716307 | -5.785333787 | -1.566037422 |
| C | -3.404463629 | -4.716918048 | -2.30592295  |
| N | -2.863029647 | -3.502315982 | -2.28552374  |
| C | -1.930314608 | -3.407014765 | -1.335686404 |
| P | -2.714497846 | 2.304248168  | 0.971097352  |
| O | -2.766301943 | 3.796867484  | 1.120467234  |
| O | -2.281846769 | 1.4369993    | 2.118972626  |
| O | -4.061093397 | 1.663126768  | 0.376723761  |
| C | -4.686078575 | 2.144104891  | -0.819995336 |
| C | -5.790629791 | 1.173581515  | -1.186435872 |
| O | -5.190433895 | -0.105210584 | -1.480690834 |
| C | -6.825085237 | 0.884214721  | -0.079056422 |
| O | -8.006972803 | 1.639266925  | -0.103272744 |
| C | -7.223795878 | -0.571718568 | -0.384292974 |
| O | -8.21473056  | -0.58667841  | -1.37869733  |
| C | -5.942899529 | -1.168140424 | -0.969650589 |
| N | -5.145093121 | -1.900902213 | 0.016493848  |
| C | -4.122113259 | -1.430241767 | 0.811650054  |
| N | -3.560337549 | -2.352432489 | 1.551649534  |
| C | -4.266711672 | -3.493685234 | 1.242744737  |
| C | -4.118894075 | -4.826795673 | 1.647697519  |
| N | -3.129593831 | -5.204176578 | 2.515041232  |
| N | -4.958398437 | -5.751651369 | 1.164596405  |
| C | -5.875439131 | -5.354705988 | 0.269124979  |
| N | -6.090938656 | -4.143903522 | -0.234773419 |
| C | -5.252066741 | -3.241039531 | 0.292075794  |
| P | -8.009909519 | 3.326174393  | -0.262331407 |
| O | -9.378252865 | 3.73499989   | 0.152868847  |
| O | -7.354751827 | 3.678033199  | -1.555198062 |
| O | -6.902464092 | 3.679625523  | 0.910853263  |
| H | 5.210563584  | 6.465304922  | 1.893133202  |
| H | 6.455376874  | 5.532871515  | -0.013726145 |
| H | 5.458993765  | 6.425554171  | -1.150354269 |
| H | 3.447189153  | 5.166460934  | -0.482693515 |
| H | 4.315537565  | 4.365906757  | 0.812957712  |

|   |              |              |              |
|---|--------------|--------------|--------------|
| H | 3.964885059  | 2.908405301  | -1.123795761 |
| H | 4.842747299  | 4.015829908  | -2.181275708 |
| H | 6.967425445  | 3.493516377  | -1.074519685 |
| H | 6.125095588  | 1.991934827  | -1.455292652 |
| H | 5.261739094  | 2.088326932  | 0.894730053  |
| H | 6.428965952  | 3.231416023  | 1.175019994  |
| H | 6.993231408  | 1.700857619  | 0.631086446  |
| H | 0.293706657  | 4.558087577  | -2.246380423 |
| H | -1.568815617 | 6.422258988  | -0.709630539 |
| H | -1.328004554 | 4.720870863  | -0.389255198 |
| H | 0.718669217  | 6.975767239  | -0.040153575 |
| H | 1.18990926   | 5.279624573  | -0.072806479 |
| H | -0.904506383 | 6.438451408  | 1.840777086  |
| H | 0.7897546    | 6.27390311   | 2.271494191  |
| H | -1.276034053 | 4.186103684  | 1.894534872  |
| H | 2.611337543  | 3.116580396  | 2.024911155  |
| H | 2.192654841  | 4.755056543  | 1.775741821  |
| H | -0.692069348 | 1.981466864  | 2.48024446   |
| H | 1.010043935  | 1.595043095  | 2.497146978  |
| H | 7.647995981  | -1.46412888  | -2.092780795 |
| H | 7.154011545  | 0.109206499  | -1.442284357 |
| H | 5.318543261  | -0.604413554 | -2.672918333 |
| H | 4.754205847  | -1.630397901 | 0.144912623  |
| H | 2.522901801  | -2.150854737 | -0.773324341 |
| H | 1.861133683  | -1.0021914   | -2.410054501 |
| H | 3.654706135  | -3.427507186 | -2.925309031 |
| H | 5.783725641  | -3.742554008 | 0.214083002  |
| H | 1.532064744  | -7.700985586 | 2.185218188  |
| H | 3.029544529  | -6.942116235 | 2.523218015  |
| H | 0.31441821   | -6.344298365 | -1.899040349 |
| H | 2.161036178  | 1.314875643  | -1.542019446 |
| H | 1.191777465  | 2.362116503  | -0.457543312 |
| H | -1.078422966 | 0.172073827  | 0.392898855  |
| H | -3.011236318 | -0.174840383 | -1.528617774 |
| H | -1.16944212  | -1.508929791 | -2.928788396 |
| H | 0.344182871  | -1.999705306 | 0.468669569  |
| H | -2.193717411 | -7.607579679 | -0.268190988 |
| H | -0.798944801 | -6.836110028 | 0.342047784  |
| H | -4.202410302 | -4.87184602  | -3.027486725 |
| H | -3.944557905 | 2.175593841  | -1.62717944  |
| H | -5.111651516 | 3.134833613  | -0.65678345  |
| H | -6.301128596 | 1.555080518  | -2.074313012 |
| H | -6.335357024 | 0.953874604  | 0.900101757  |
| H | -7.546046242 | -1.120350464 | 0.510982042  |
| H | -8.679809611 | 0.261385289  | -1.256902023 |
| H | -6.186550261 | -1.885938662 | -1.757434596 |
| H | -3.852941035 | -0.383679579 | 0.806057037  |
| H | -2.828089956 | -6.157557755 | 2.357449238  |
| H | -2.358492836 | -4.546544893 | 2.550119181  |

|   |              |              |              |
|---|--------------|--------------|--------------|
| H | -6.526006785 | -6.143130325 | -0.10442357  |
| C | -7.280145918 | 3.465486314  | 2.251202541  |
| H | -6.443341661 | 3.786303114  | 2.878862281  |
| H | -8.181092389 | 4.037304618  | 2.502528861  |
| H | -7.482122718 | 2.402976879  | 2.44745252   |
| P | 8.331112403  | -0.57861756  | 0.854406613  |
| O | 8.20139206   | 0.896516667  | 0.448503093  |
| O | 8.177598004  | -1.007075434 | 2.266291656  |
| C | 9.902375654  | -1.161218852 | 0.129431852  |
| H | 10.73828447  | -0.656966464 | 0.622709841  |
| H | 9.948647338  | -0.943681212 | -0.942655839 |
| H | 10.00087312  | -2.239200644 | 0.282789977  |
| C | -0.449201217 | 1.469935269  | -2.637803863 |
| O | -1.759147219 | 0.907685348  | -2.769738329 |
| H | 0.15953354   | 1.216052312  | -3.513006871 |
| H | -0.518405257 | 2.555071314  | -2.529986469 |
| C | 6.260995024  | 8.053503644  | 0.909538927  |
| C | 3.785676001  | 7.616303469  | 0.783619218  |
| C | -1.666928306 | 4.95519635   | -3.027700896 |
| C | 0.237593158  | 6.605175338  | -2.861869229 |
| H | -2.143858543 | 4.077784609  | -2.578175888 |
| H | -1.406951431 | 4.711883951  | -4.064800162 |
| H | -2.413149217 | 5.758688078  | -3.046258743 |
| H | -0.42481909  | 7.479286233  | -2.809382203 |
| H | 0.467445094  | 6.423655509  | -3.918369238 |
| H | 1.175934762  | 6.863786032  | -2.356639792 |
| H | 3.663386279  | 8.076703693  | -0.205391485 |
| H | 3.636802863  | 8.395748015  | 1.539024042  |
| H | 2.982152468  | 6.883495745  | 0.905418708  |
| H | 7.256299358  | 7.612185027  | 1.035470815  |
| H | 6.110234064  | 8.782108133  | 1.714080433  |
| H | 6.254535434  | 8.599712989  | -0.042321534 |
